# Supplementary material
Source: PubMed Central journal article supplement (PMC8288561)

**Fig. S1**

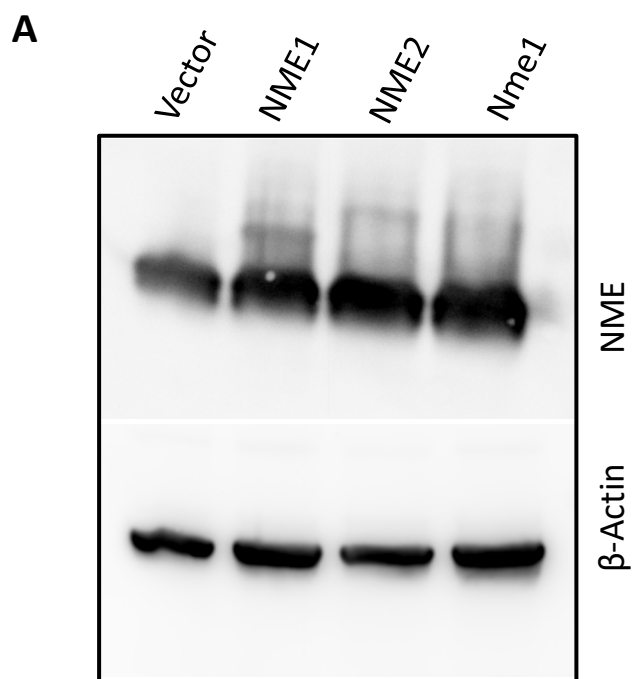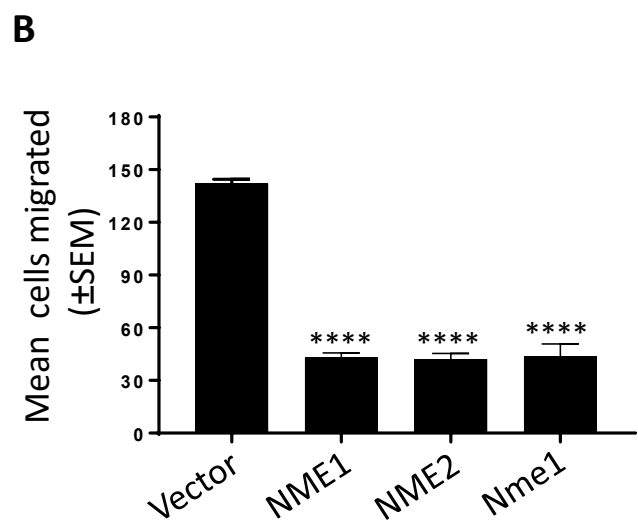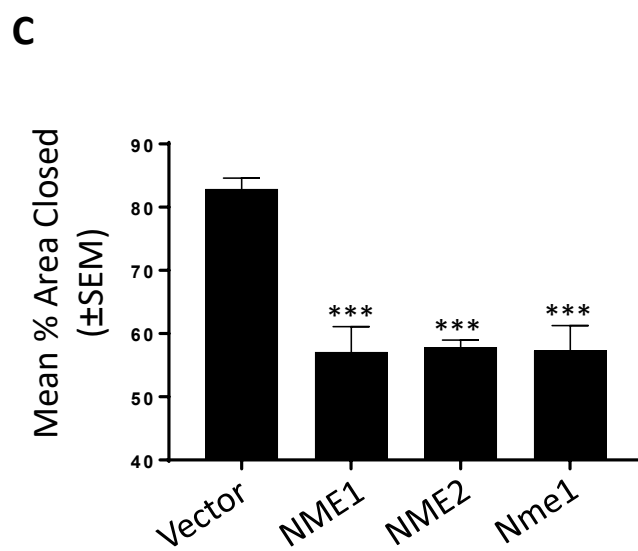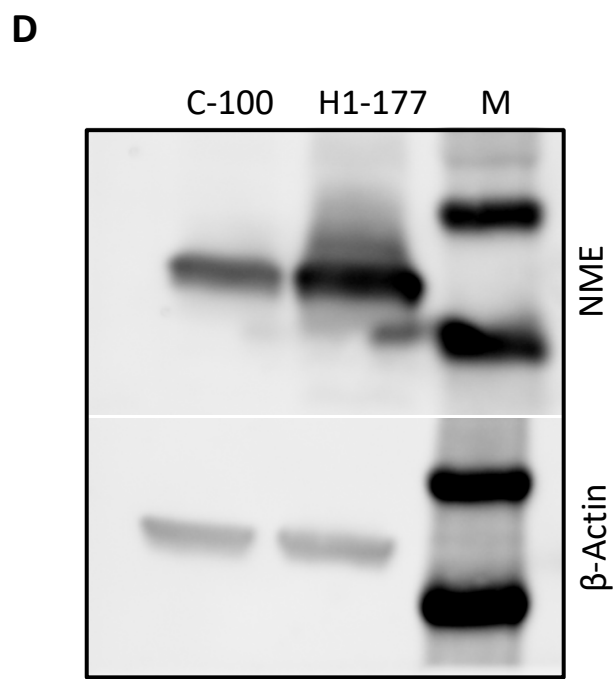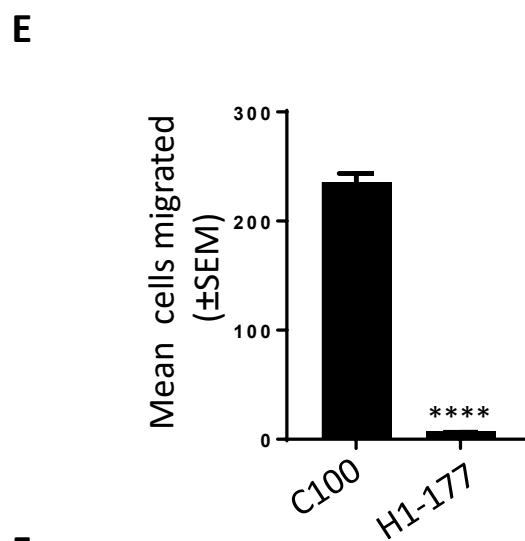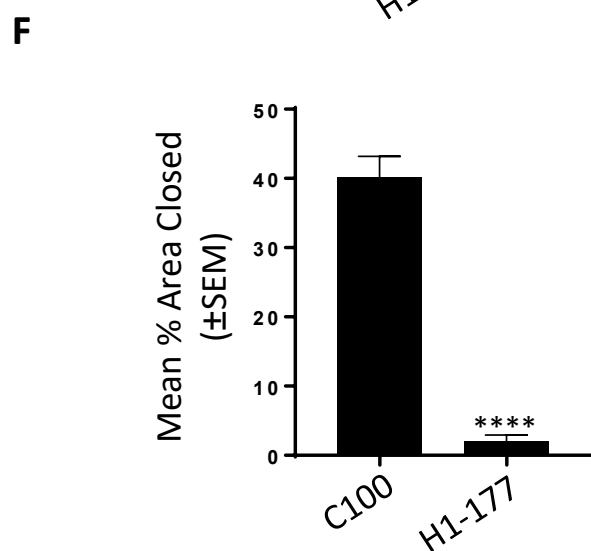

**Fig. S2****A**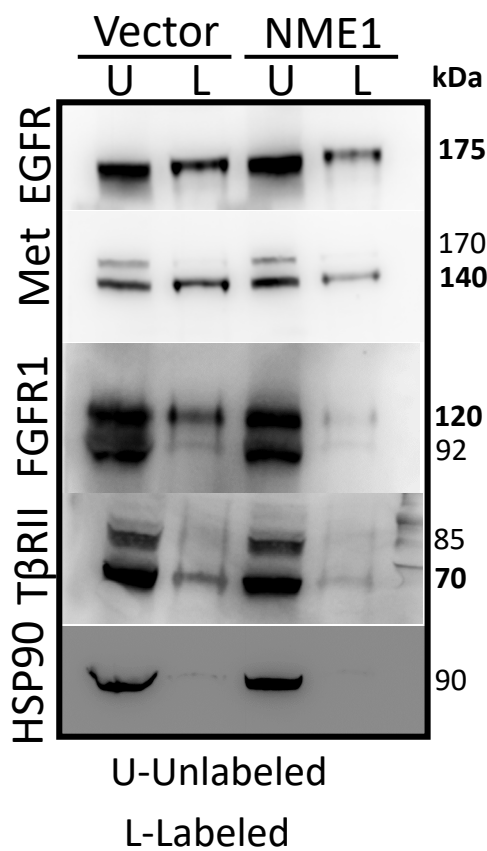**B**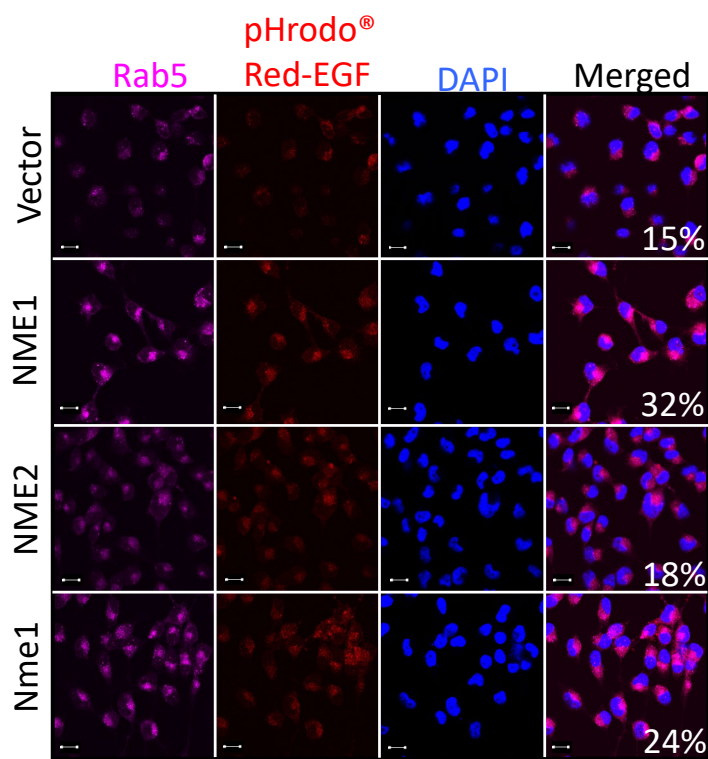**C**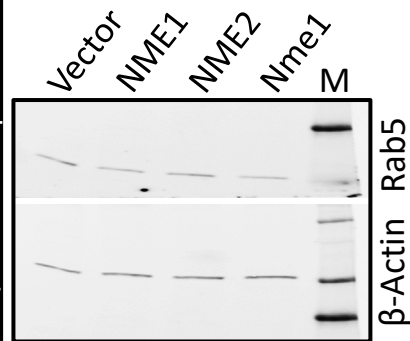**D**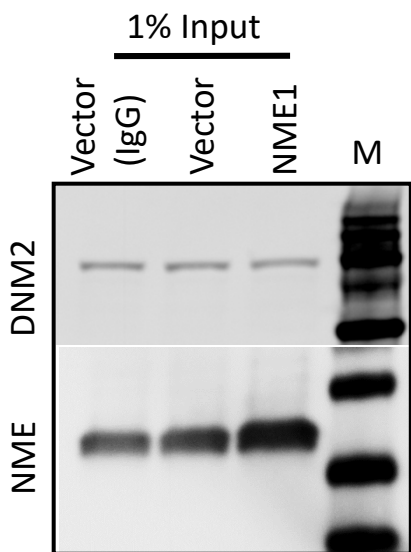**E**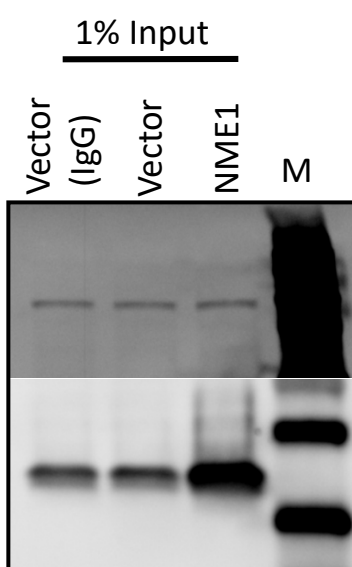**F**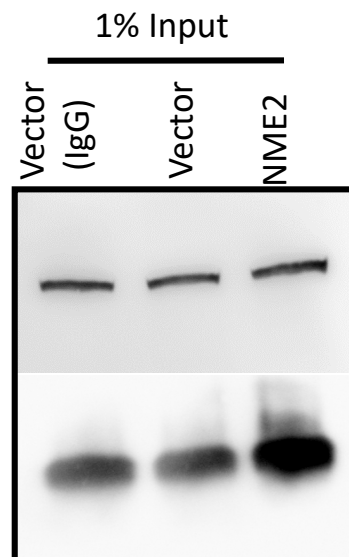

**Fig. S3**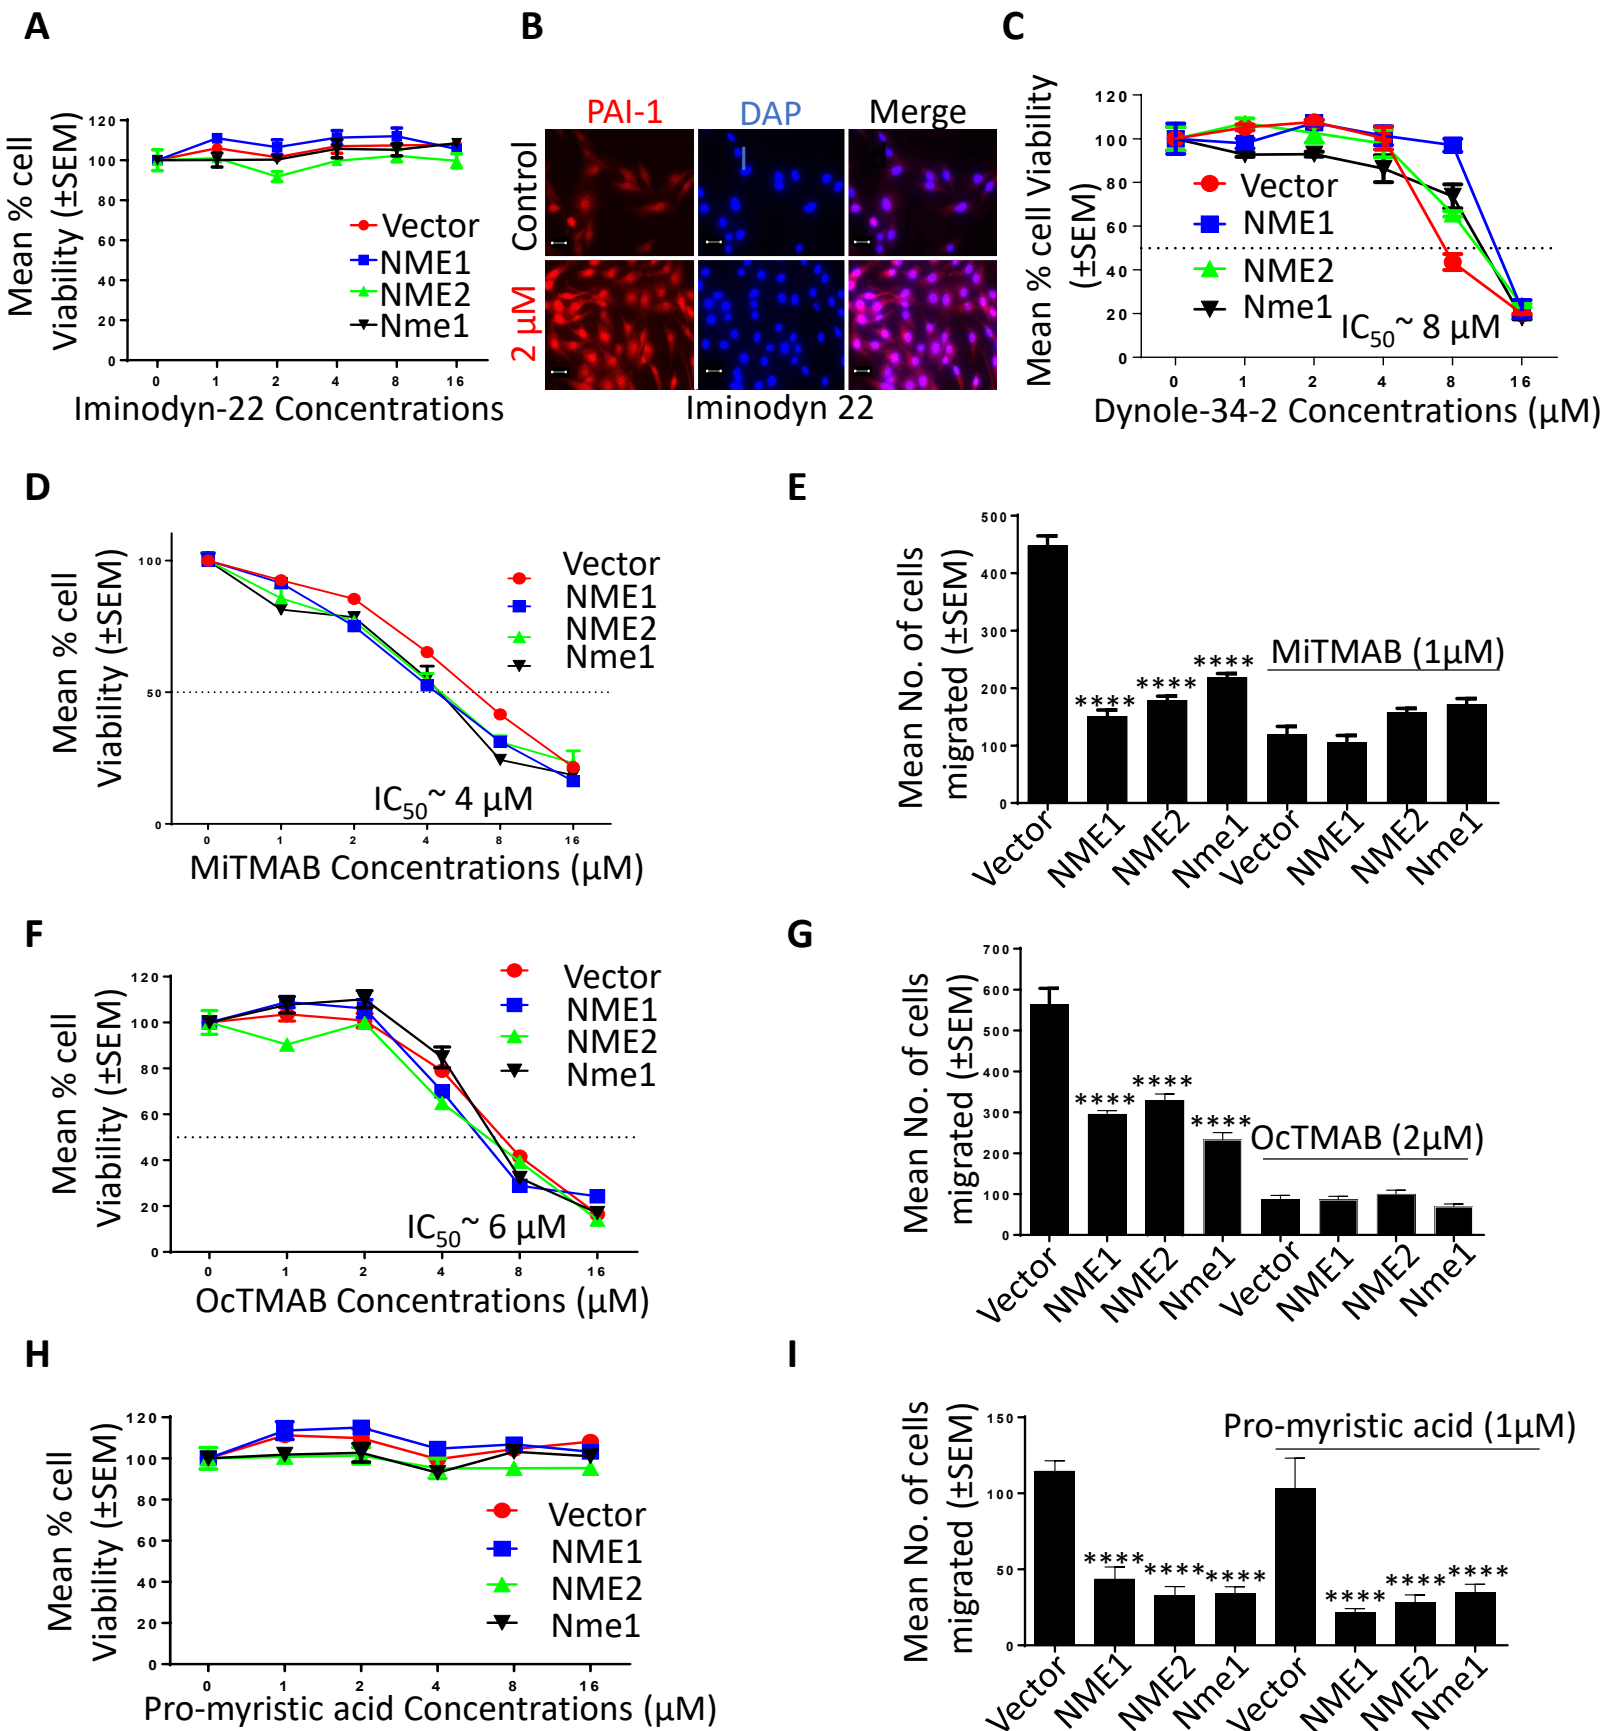

**Fig. S4****A**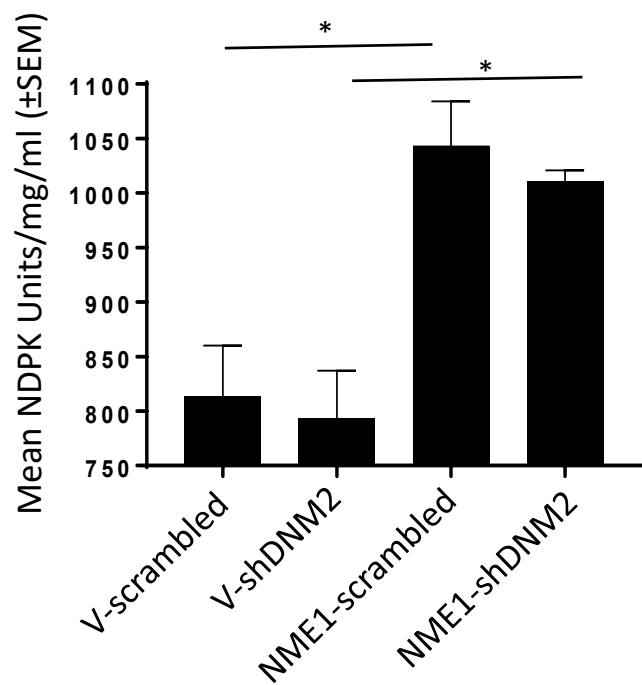**B**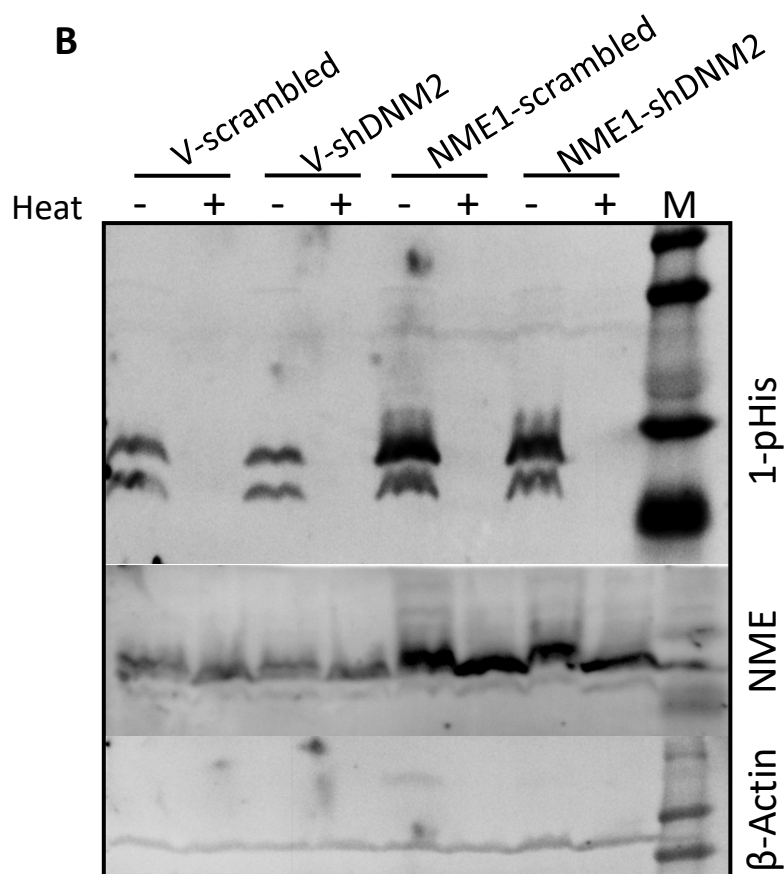**C**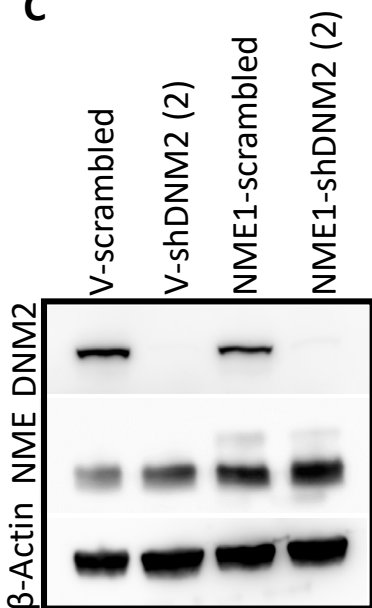**D**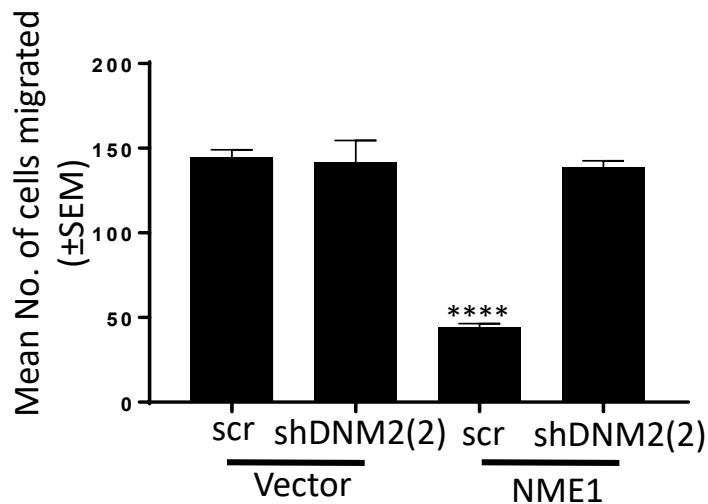**E**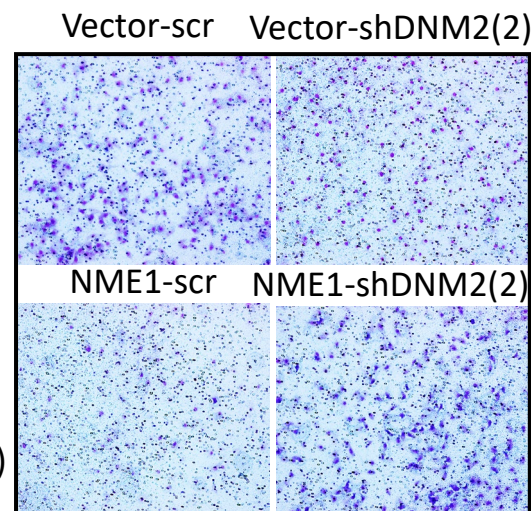

**Fig. S5**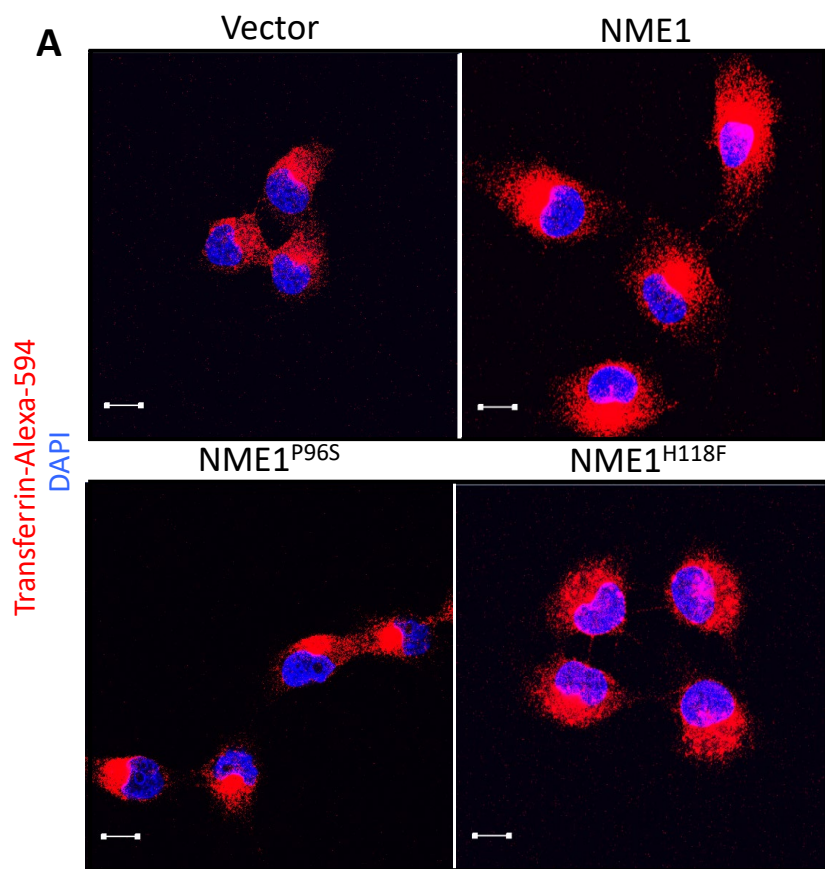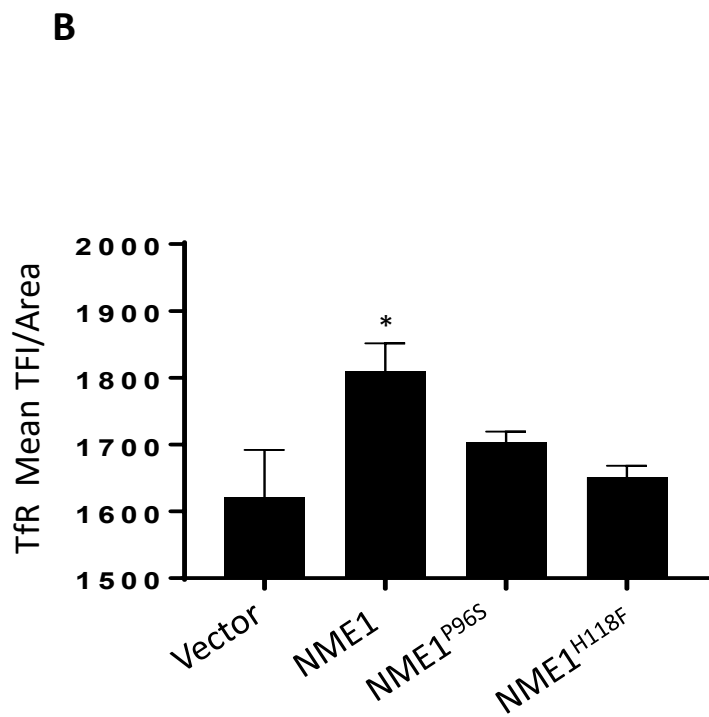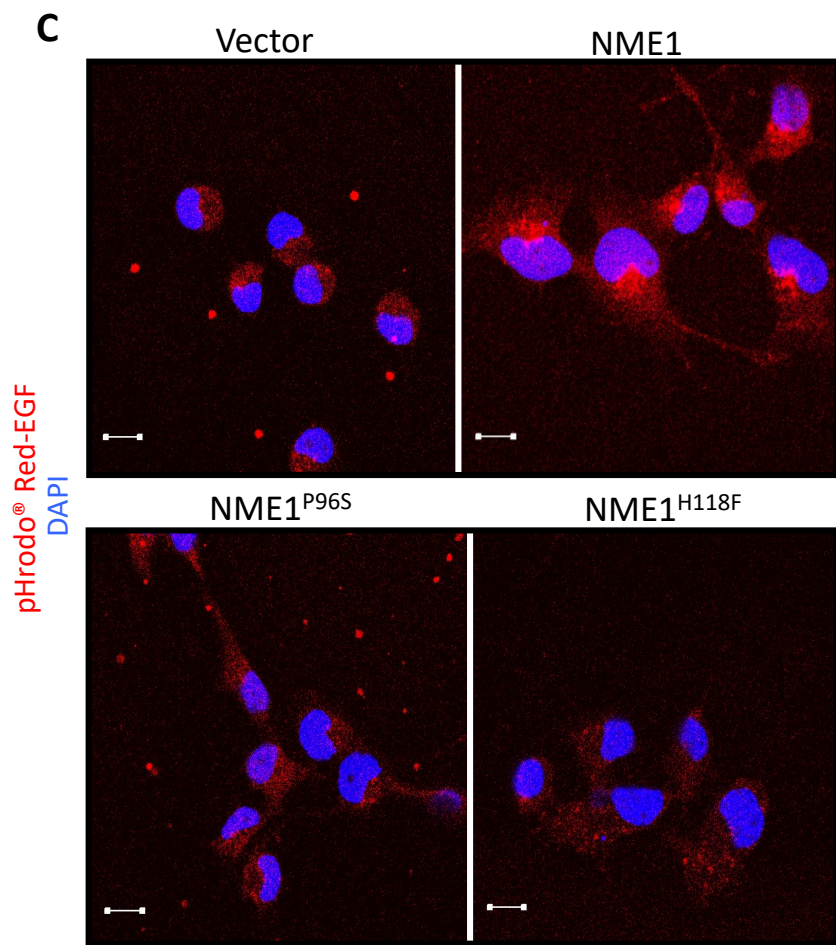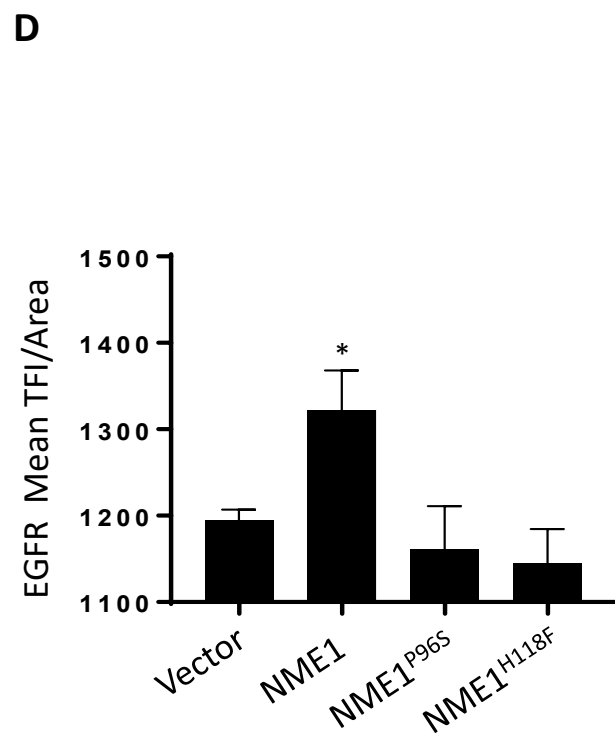

**Fig. S6**

**A**

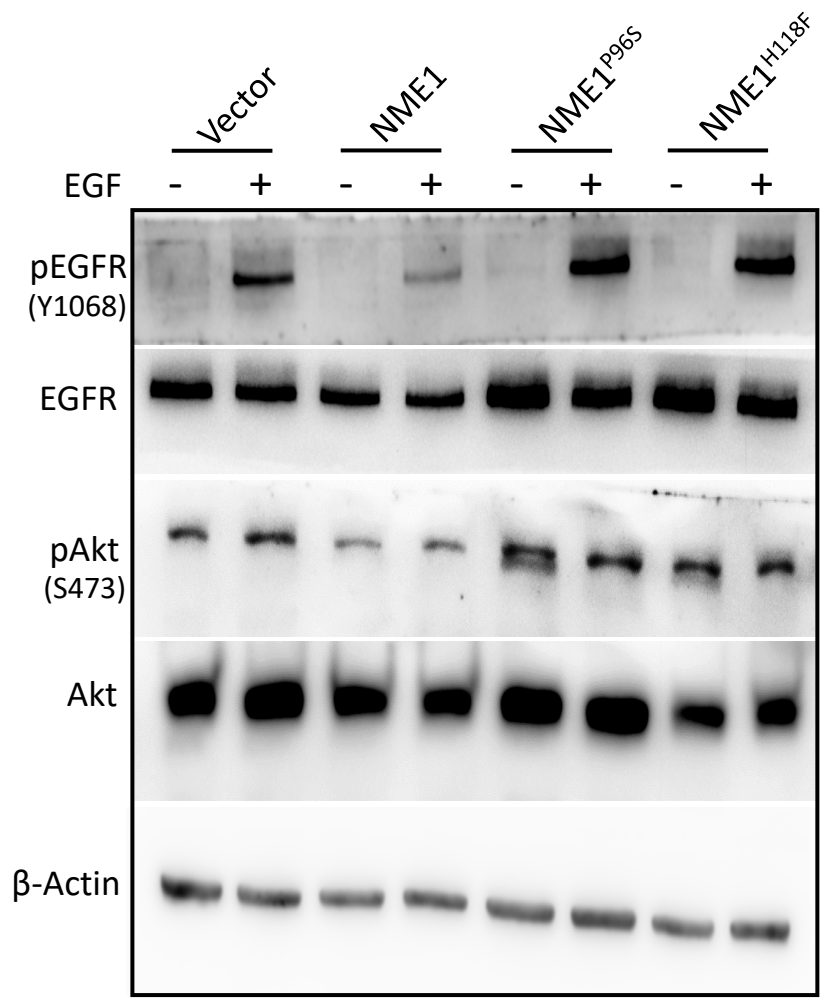

**B**

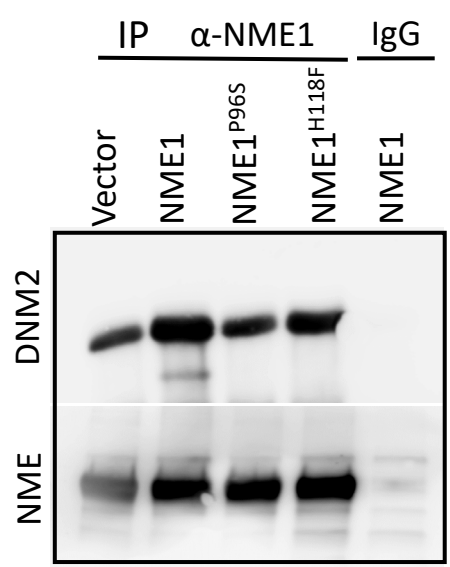

**C**

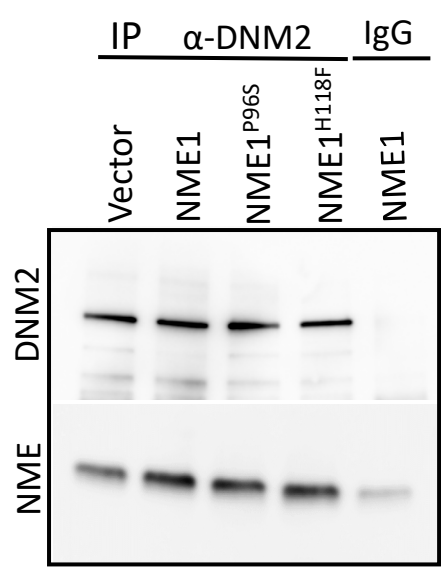

**D**

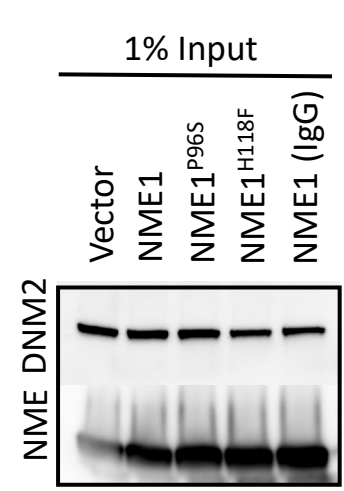

**Figure S7****A**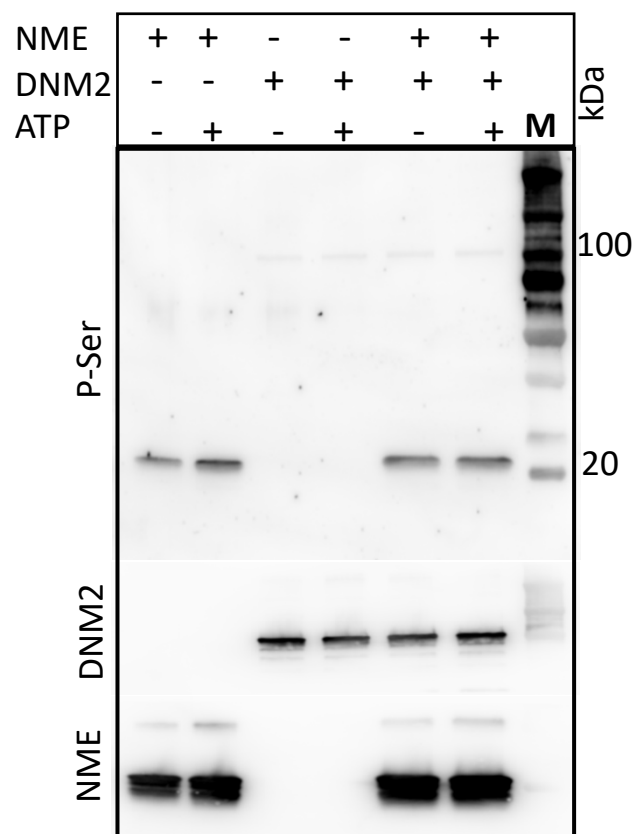**B**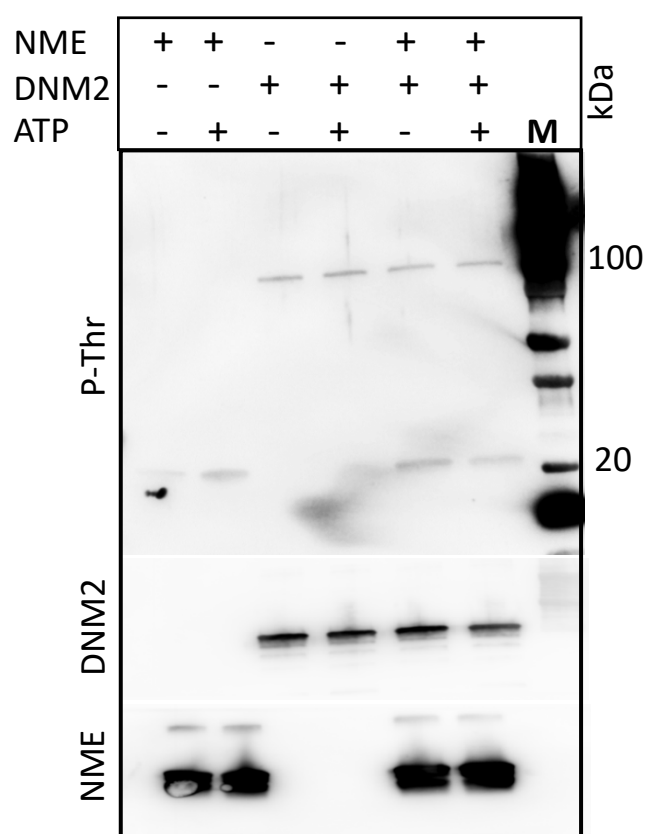**C**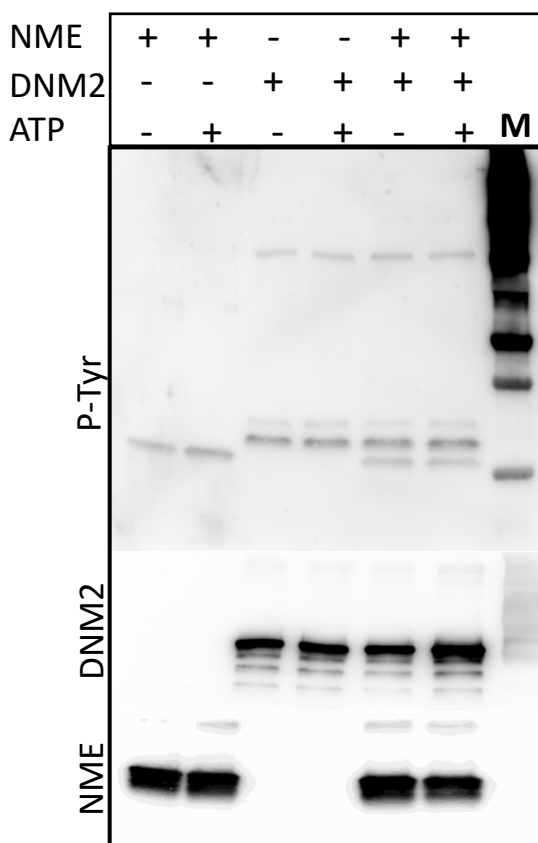**D**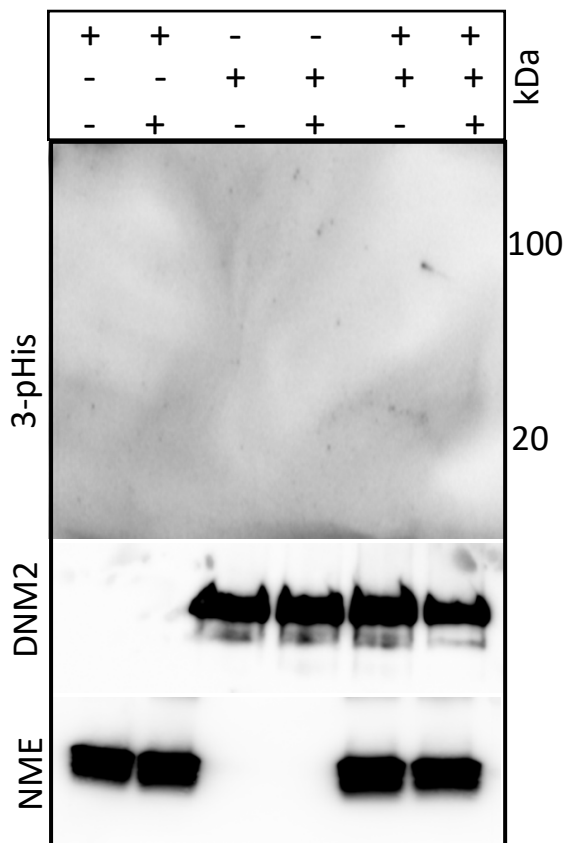**E**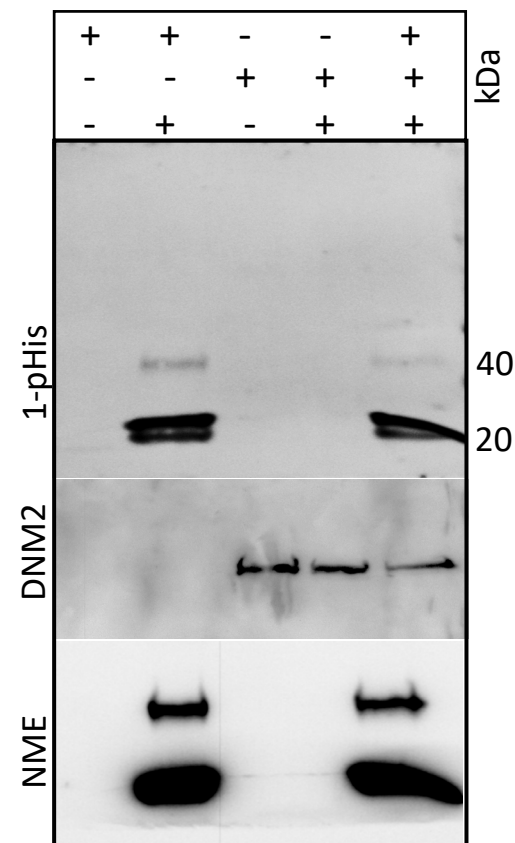

Supplement: NIHMS1534995-supplement-1.pdf [file NIHMS1534995-supplement-1.pdf]
